# Supplementary material for: Dichlorine-containing chlorobismuthate(iii) supramolecular hybrid: structure and experimental studies of stability
Source: Royal Society of Chemistry journal article supplement (doi:10.1039/d2ce00210h), 2022-01-01
Supplement: d2ce00210h1.pdf [file d2ce00210h1.pdf]

## Supplementary Information

### Dichlorine-containing chlorobismuthate(III) supramolecular hybrid: structure and experimental studies of stability

Nikita A. Korobeynikov, Andrey N. Usoltsev, Boris A. Kolesov, Pavel A. Abramov, Pavel E. Plyusnin, Maxim N. Sokolov and Sergey A. Adonin

#### Synthetic procedures

All reagents were obtained from commercial sources and used without additional purification.

**Caution:** All experiments with dichlorine require obligatory use of fume hood and presence of adequate exhaust ventilation, as well as eye (goggles) and skin (gloves) protection.

#### Synthesis of **1**

93.2 mg (0.2 mmol) of  $\text{Bi}_2\text{O}_3$  and 44 mg (0.4 mmol) of  $\text{Me}_4\text{NCl}$  were dissolved in 4 ml of concentrated HCl and heated to 60°C. At this temperature, excess of dichlorine was bubbled through the solution for 5 min. Solution was filtered and  $\text{Cl}_2$  was bubbled for another 5 min. Then the vial was closed and slowly cooled to 5°C. Within one day, there form transparent crystals of **1**. Yield: 69%. For  $\text{C}_{12}\text{H}_{36}\text{Bi}_2\text{Cl}_{11}\text{N}_3$  calcd, %: C, 14.05; H, 3.54; N, 4.10; found, %: C, 14.06; H, 3.58; N, 4.11.

#### X-ray Diffractometry

Crystallographic data and refinement details for **1** are given in Table S1. The diffraction data were collected on a Bruker D8 Venture diffractometer with a CMOS PHOTON III detector and  $\text{I}\mu\text{S}$  3.0 source (Mo  $\text{K}\alpha$  radiation,  $\lambda = 0.71073 \text{ \AA}$ ) at 150 K. The  $\phi$ - and  $\omega$ -scan techniques were employed. Absorption correction was applied by SADABS (Bruker Apex3 software suite: Apex3, SADABS-2016/2 and SAINT, version 2018.7-2; Bruker AXS Inc.: Madison, WI, 2017.). Structures were solved by SHELXT[1] and refined by full-matrix least-squares treatment against  $|F|^2$  in anisotropic approximation with SHELX 2014/7[2] in ShelXle program.[3] H-atoms were refined in the geometrically calculated positions. The crystallographic data have been deposited in the Cambridge Crystallographic Data Centre under the deposition codes CCDC 2141780.

[1] G.M. Sheldrick, Acta Crystallogr. Sect. A Found. Adv. 71 (2015) 3–8.

[2] G.M. Sheldrick, Acta Crystallogr. Sect. C Struct. Chem. 71 (2015) 3–8.

[3] C.B. Hübschle, G.M. Sheldrick, B. Dittrich, J. Appl. Crystallogr. 44 (2011) 1281–1284.

**Table S1.** Details of XRD experiment for **1**

|                                                                            | <b>1</b>                                                                                                              |
|----------------------------------------------------------------------------|-----------------------------------------------------------------------------------------------------------------------|
| Chemical formula                                                           | $C_{12}H_{36}Bi_2Cl_{11}N_3$                                                                                          |
| $M_r$                                                                      | 1030.35                                                                                                               |
| Crystal system, space group                                                | Hexagonal, $P6_3/mmc$                                                                                                 |
| Temperature (K)                                                            | 150                                                                                                                   |
| $a, c$ (Å)                                                                 | 9.1792 (3), 21.9776 (10)                                                                                              |
| $V$ (Å <sup>3</sup> )                                                      | 1603.69 (13)                                                                                                          |
| $Z$                                                                        | 2                                                                                                                     |
| Radiation type                                                             | Mo Ka                                                                                                                 |
| $\mu$ (mm <sup>-1</sup> )                                                  | 11.88                                                                                                                 |
| Crystal size (mm)                                                          | 0.12 × 0.10 × 0.04                                                                                                    |
| Diffractometer                                                             | Bruker D8 Venture diffractometer                                                                                      |
| Absorption correction                                                      | Multi-scan<br>SADABS 2016/2: Krause, L., Herbst-Irmer, R., Sheldrick G.M. & Stalke D., J. Appl. Cryst. 48 (2015) 3-10 |
| $T_{min}, T_{max}$                                                         | 0.524, 0.746                                                                                                          |
| No. of measured, independent and observed [ $I > 2\sigma(I)$ ] reflections | 16530, 621, 615                                                                                                       |
| $R_{int}$                                                                  | 0.110                                                                                                                 |
| $\theta$ values (°)                                                        | $\theta_{max} = 25.7, \theta_{min} = 2.6$                                                                             |
| $(\sin \theta/\lambda)_{max}$ (Å <sup>-1</sup> )                           | 0.609                                                                                                                 |
| Range of $h, k, l$                                                         | $-11 \leq h \leq 11, -11 \leq k \leq 11, -26 \leq l \leq 26$                                                          |
| $R[F^2 > 2\sigma(F^2)], wR(F^2), S$                                        | 0.061, 0.141, 1.45                                                                                                    |
| No. of reflections, parameters, restraints                                 | 621, 50, 94                                                                                                           |
| H-atom treatment                                                           | H-atom parameters constrained                                                                                         |
| Weighting scheme                                                           | $w = 1/[\sigma^2(F_o^2) + 50.5902P]$ where $P = (F_o^2 + 2F_c^2)/3$                                                   |
| $D\rho_{max}, D\rho_{min}$ (e Å <sup>-3</sup> )                            | 1.76, -2.46                                                                                                           |

Computer programs: *APEX3* (Bruker-AXS, 2016), *SAINT* (Bruker-AXS, 2016), *SHELXT* 2014/5 (Sheldrick, 2014), *SHELXL2017/1* (Sheldrick, 2017).

### Powder X-ray diffractometry

XRD analysis of polycrystals was performed on Shimadzu XRD-7000 diffractometer (CuK-alpha radiation, Ni – filter, linear One Sight detector, 5 – 50° 2 $\theta$  range, 0.0143° 2 $\theta$  step, 2s per step). A polycrystalline sample was slightly ground with hexane in an agate mortar, and the resulting suspension was deposited on the polished side of a standard quartz sample holder, and a

smooth thin layer being formed after drying. Plotting of PXRD patterns and data treatment was performed using X'Pert Plus software.

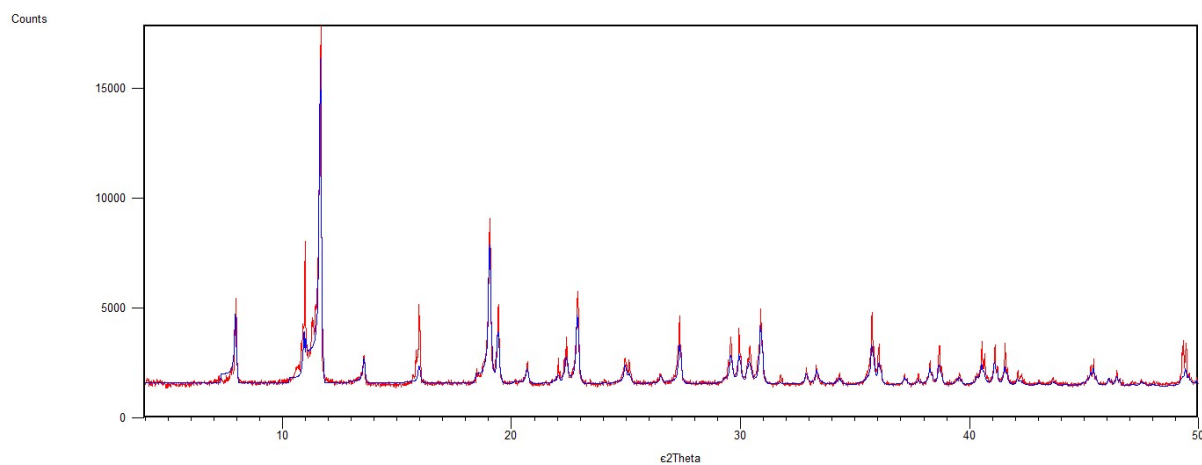

**Figure S1.** Theoretical (blue) and experimental (red) PXRD patterns for **1**

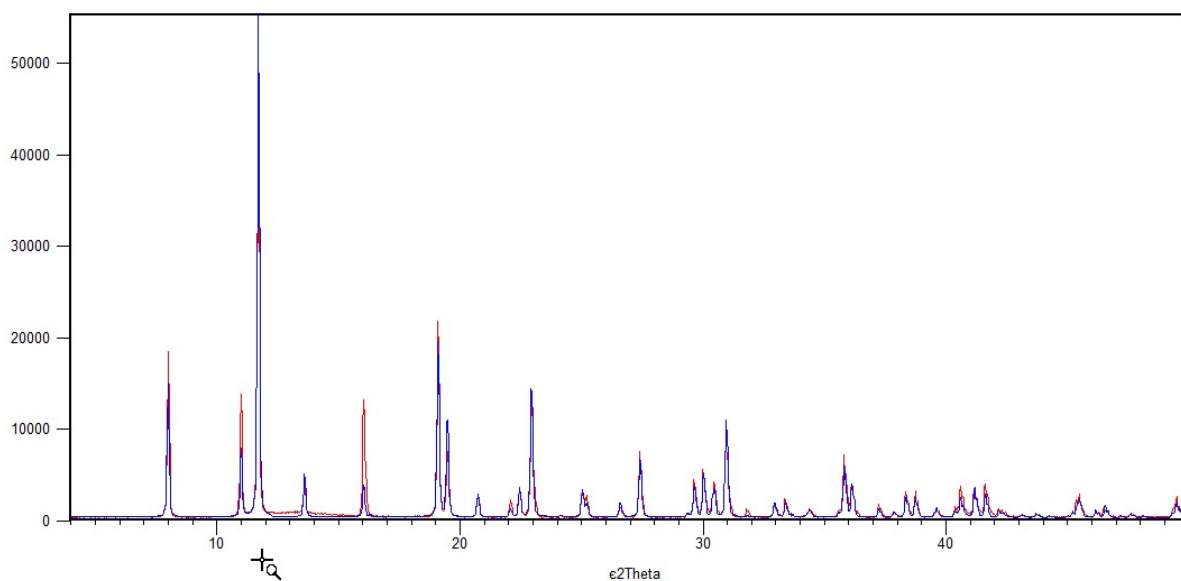

**Figure S2.** Experimental PXRD pattern (red) of the sample of **1** after TGA thermostatic experiment (140°C, ~40 min) compared to theoretical pattern of **1** (blue)

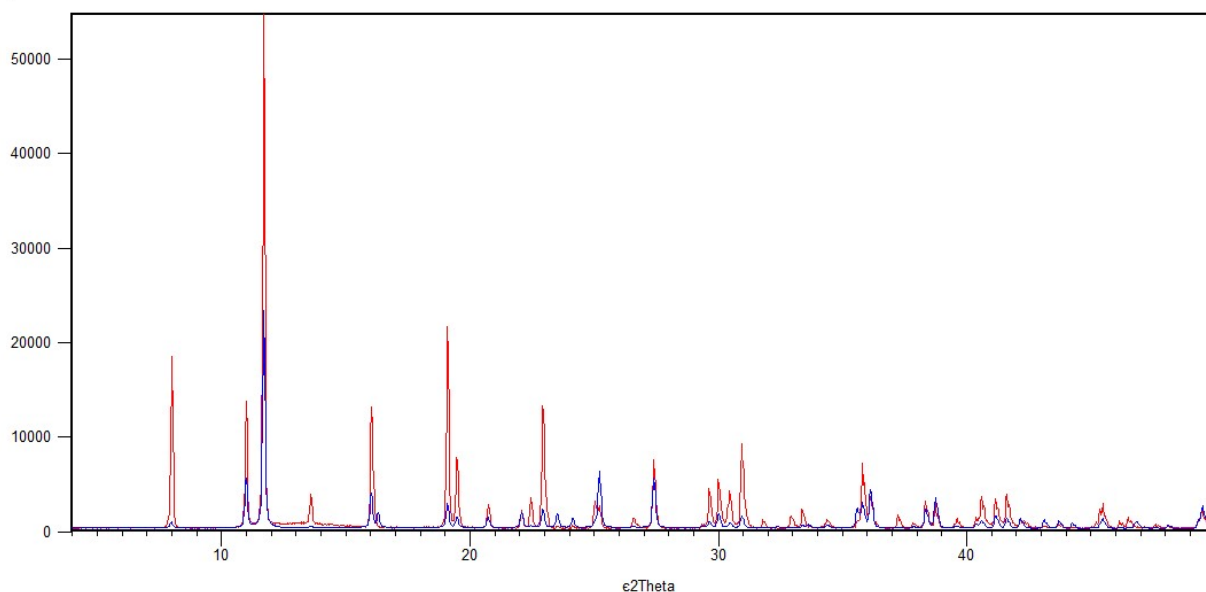

**Figure S3.** Experimental PXRD pattern (red) of the sample of **1** after TGA thermostatic experiment (140°C, ≈40 min) compared to theoretical pattern of TMA<sub>3</sub>[Bi<sub>2</sub>Cl<sub>9</sub>] (blue)

### Raman spectroscopy

Raman spectra were collected using a LabRAM HR Evolution (Horiba) spectrometer with the excitation by the 633 nm line of the He-Ne laser. The spectra at room temperatures were obtained in the backscattering geometry with a Raman microscope. The laser beam was focused to a diameter of 2 micrometers using a LMPlan FL 50x/0.50 Olympus objective. The spectral resolution was 0.7 cm<sup>-1</sup>. The laser power on the sample surface was about 0.03 mW.

**Thermogravimetric analyses (TGA)** were carried out on a TG 209 F1 Iris thermobalance (NETZSCH, Germany). The measurements were made in a helium flow in the temperature range of 30–450°C using the heating rate of 10°C min<sup>-1</sup> the gas flow rate of 60 mL min<sup>-1</sup> and open Al crucibles.
